# Supplementary material
Source: ML conference proceedings conference paper supplement (https://openreview.net/forum?id=hTbzXCpZEv)
Supplement: supplementary_material [file o4-compare.pdf › supplement/MMR-V-main/figs/o4-compare.pdf]

# Comparative Case Study of MCoTs

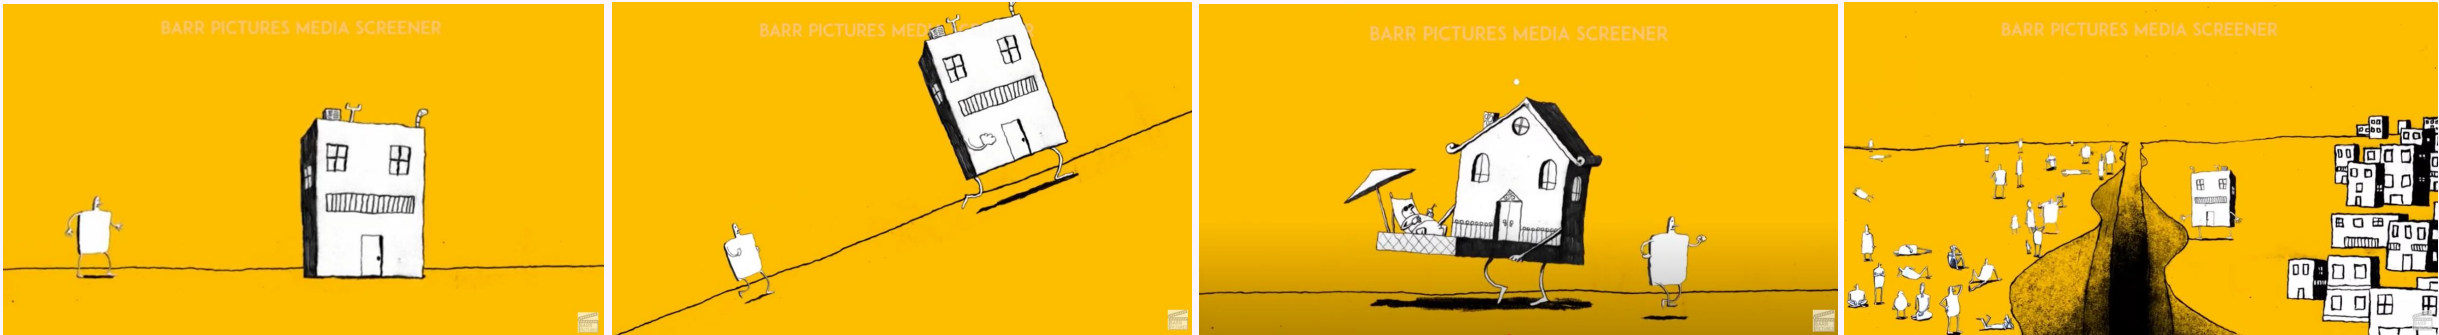

**Question:** What does the object being chased by the people refer to?

**Options:**

- (A) Difficulties in life.
- (B) His fully automatic house that can walk autonomously.
- (C) The house that this person is saving money to buy.
- (D) The old house that the family decided to renovate.
- (E) The villa that the rich man bought as a vacation home.
- (F) The mansion that the celebrity owns in the city center.
- ☒ (G) The cottage that the couple wants to rent for their honeymoon.
- (H) The enchanted house.

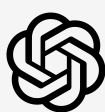

**o4-mini-CoT:** The animation shows people in hot pursuit of a walking house literally chasing after a home. In the course of the film we see the house slipping through rain, snow, across seas and canyons, always just out of reach, until in the end it stands on the far side of a great divide between a crowd of people and a cluster of buildings. This is a metaphor for the endless struggle to afford and finally own a home. Thus the chased object refers to the house the person is saving up to buy. **[[C]]**

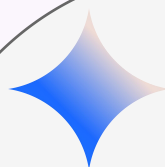

**Gemini-2.0-Flash-Thinking-CoT:** The Thinking Process:  
1. Identify the question: The question asks about the meaning of "the object being chased by the people".  
2. Watch the video and observe the object: The video clearly depicts a house with legs walking and being chased by people.  
3. Analyze the options and compare them to the video:  
\* (A) Difficulties in life: While metaphorical interpretations are possible, the video literally shows a house being chased. This option is too abstract and doesn't directly relate to the visual content.  
\* (B) His fully automatic house that can walk autonomously: This option directly describes what is seen in the video — a house that can walk on its own. This is a strong contender.  
\* (C) The house that this person is saving money to buy: There is no visual or narrative element in the short video clip about saving money or buying a house. This option is not supported by the video.  
\* (D) The old house that the family decided to renovate: No renovation or family context is present in the clip. This option is irrelevant.  
\* (E) The villa that the rich man bought as a vacation home: The video does not suggest wealth, vacation, or a villa specifically. This option is not supported.  
\* (F) The mansion that the celebrity owns in the city center: No celebrity, mansion, or city center is depicted. This option is irrelevant.  
\* (G) The cottage that the couple wants to rent for their honeymoon: There is no mention of a couple, honeymoon, or cottage rental in the video clip. This option is irrelevant.  
\* (H) The enchanted house: While the walking house could be considered "enchanted," option (B) is more precise and descriptive of the "mechanism" of the house's unusual behavior (autonomously walking). "Enchanted" is a more general and less accurate description compared to "fully automatic house that can walk autonomously".  
4. Select the best option: Option (B) is the most direct, accurate, and visually supported answer based on the video. It literally describes the object being chased.  
**Final Answer: [[B]]**
