# Supplementary material
Source: ML conference proceedings conference paper supplement (https://openreview.net/forum?id=hTbzXCpZEv)

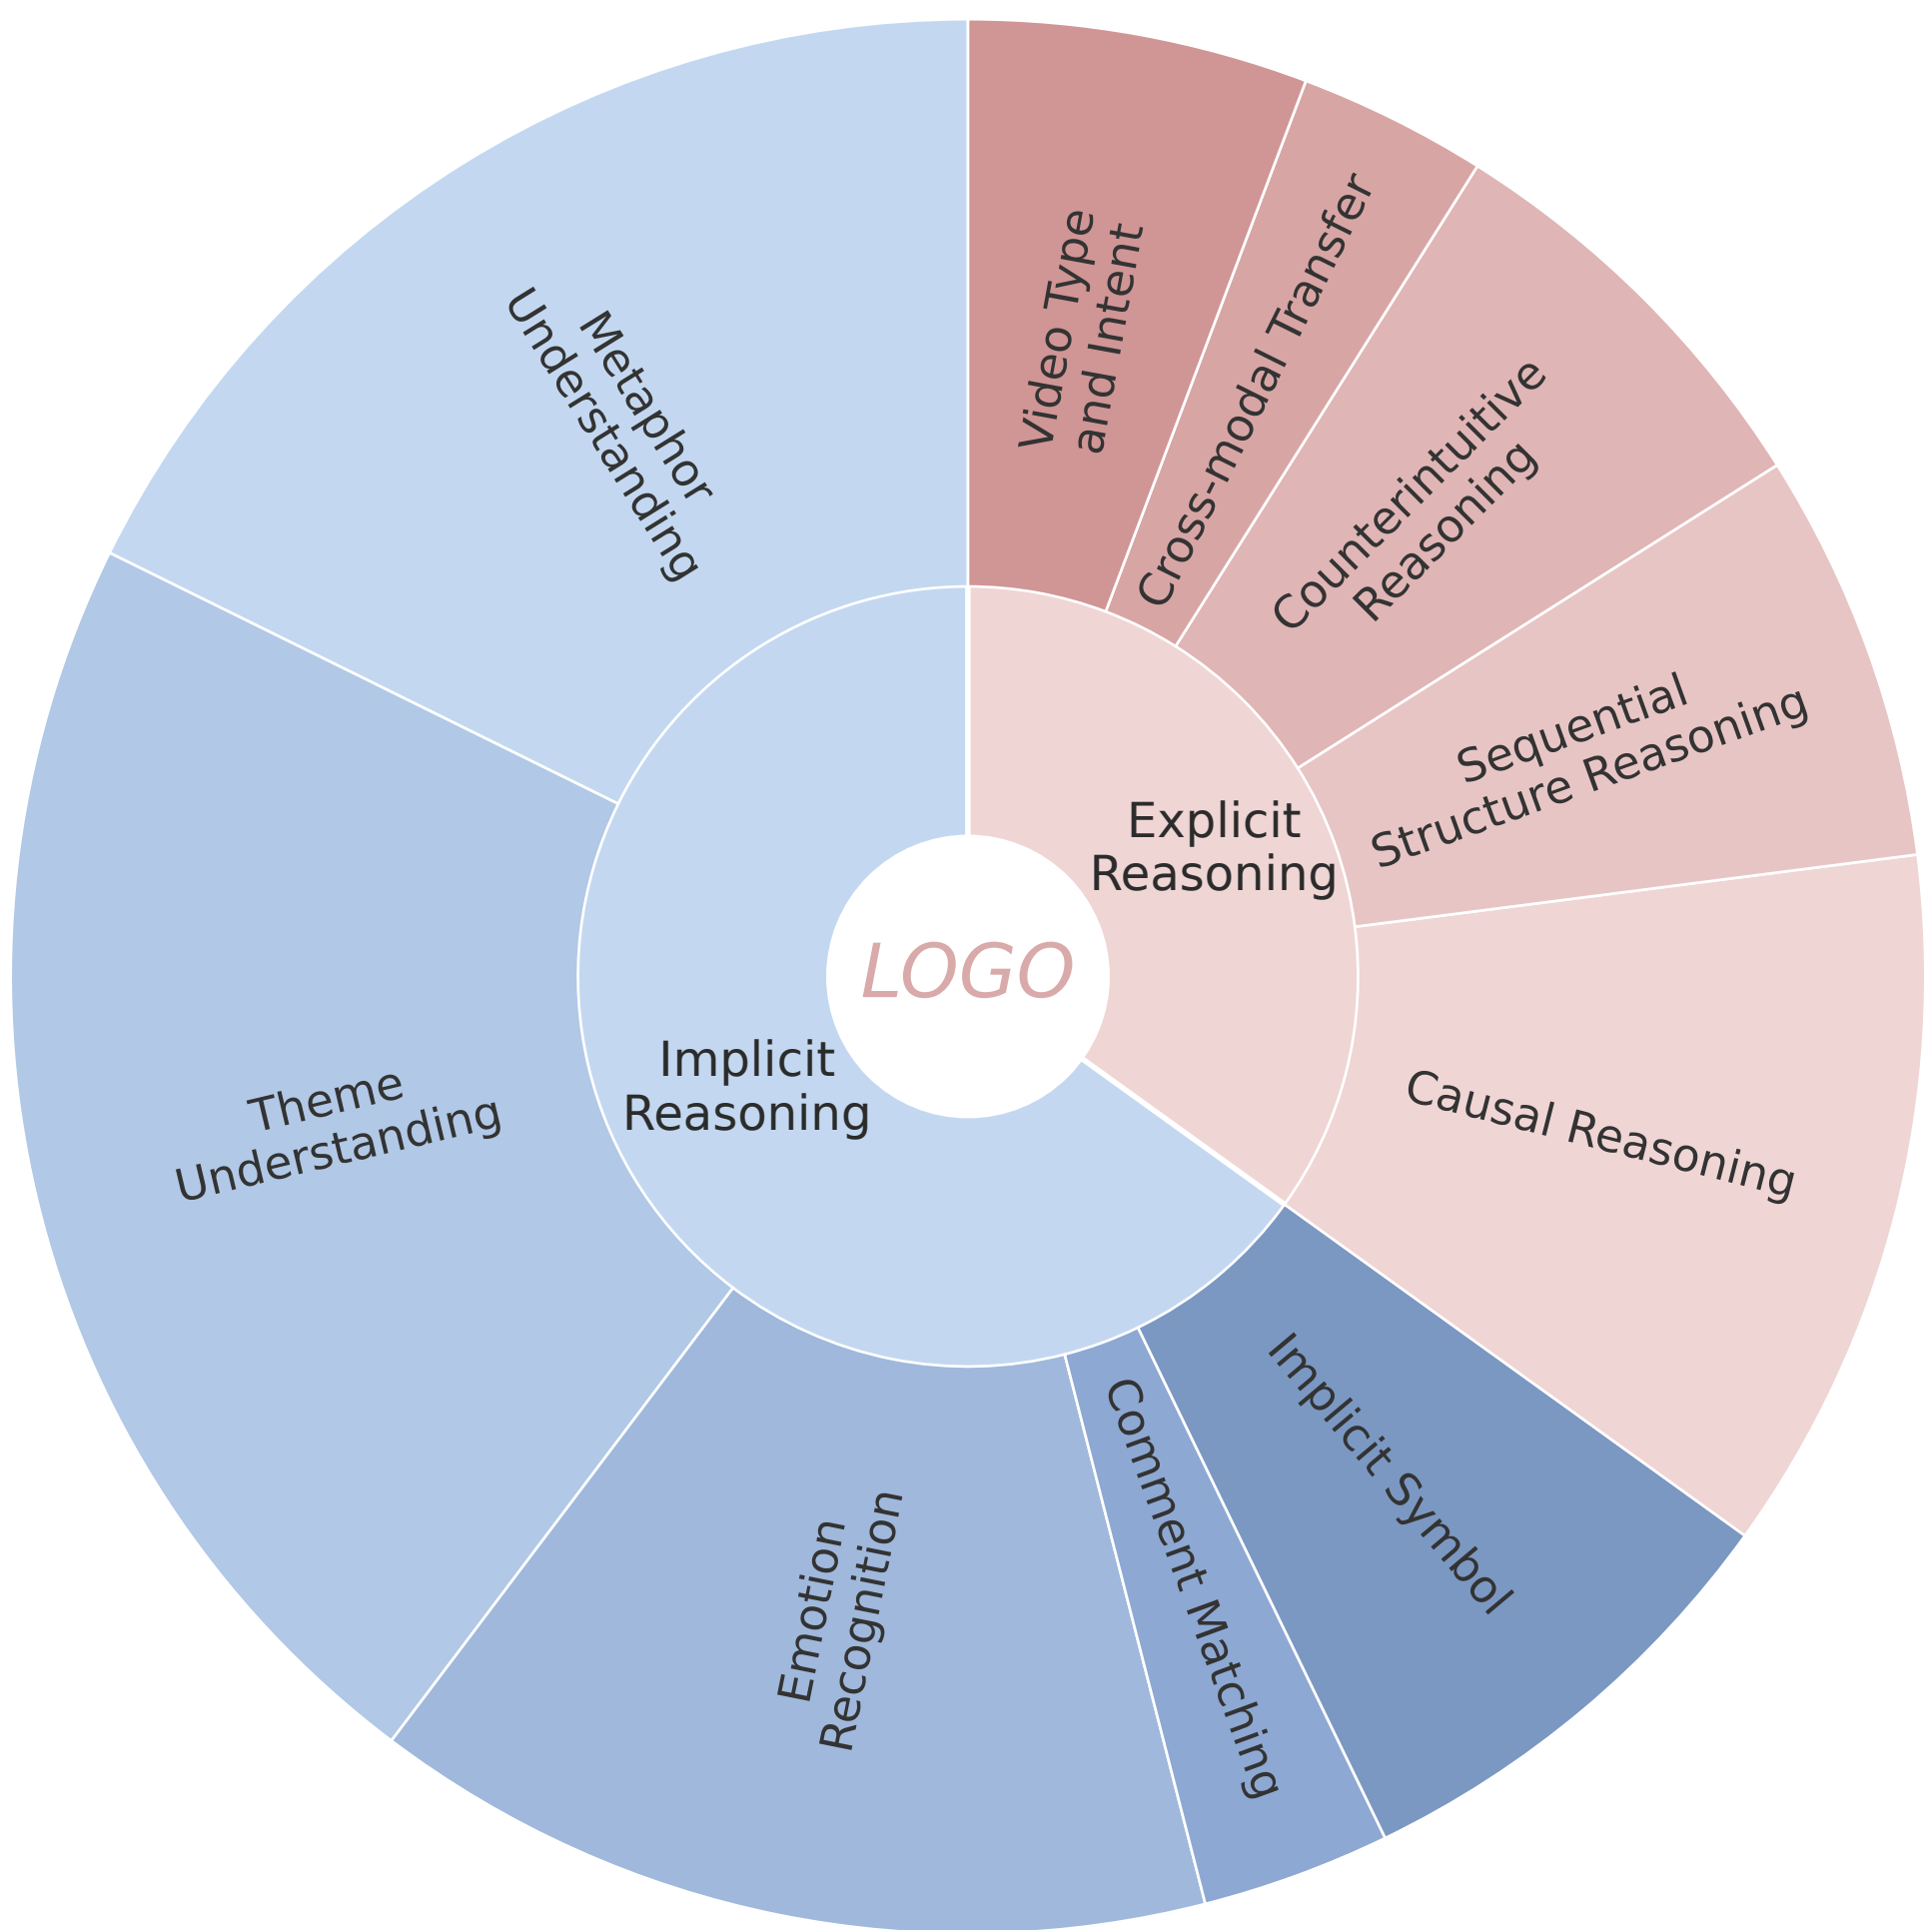

Supplement: supplementary_material [file ability_type.pdf › supplement/MMR-V-main/figs/ability_type.pdf]

# Video Category Taxonomy

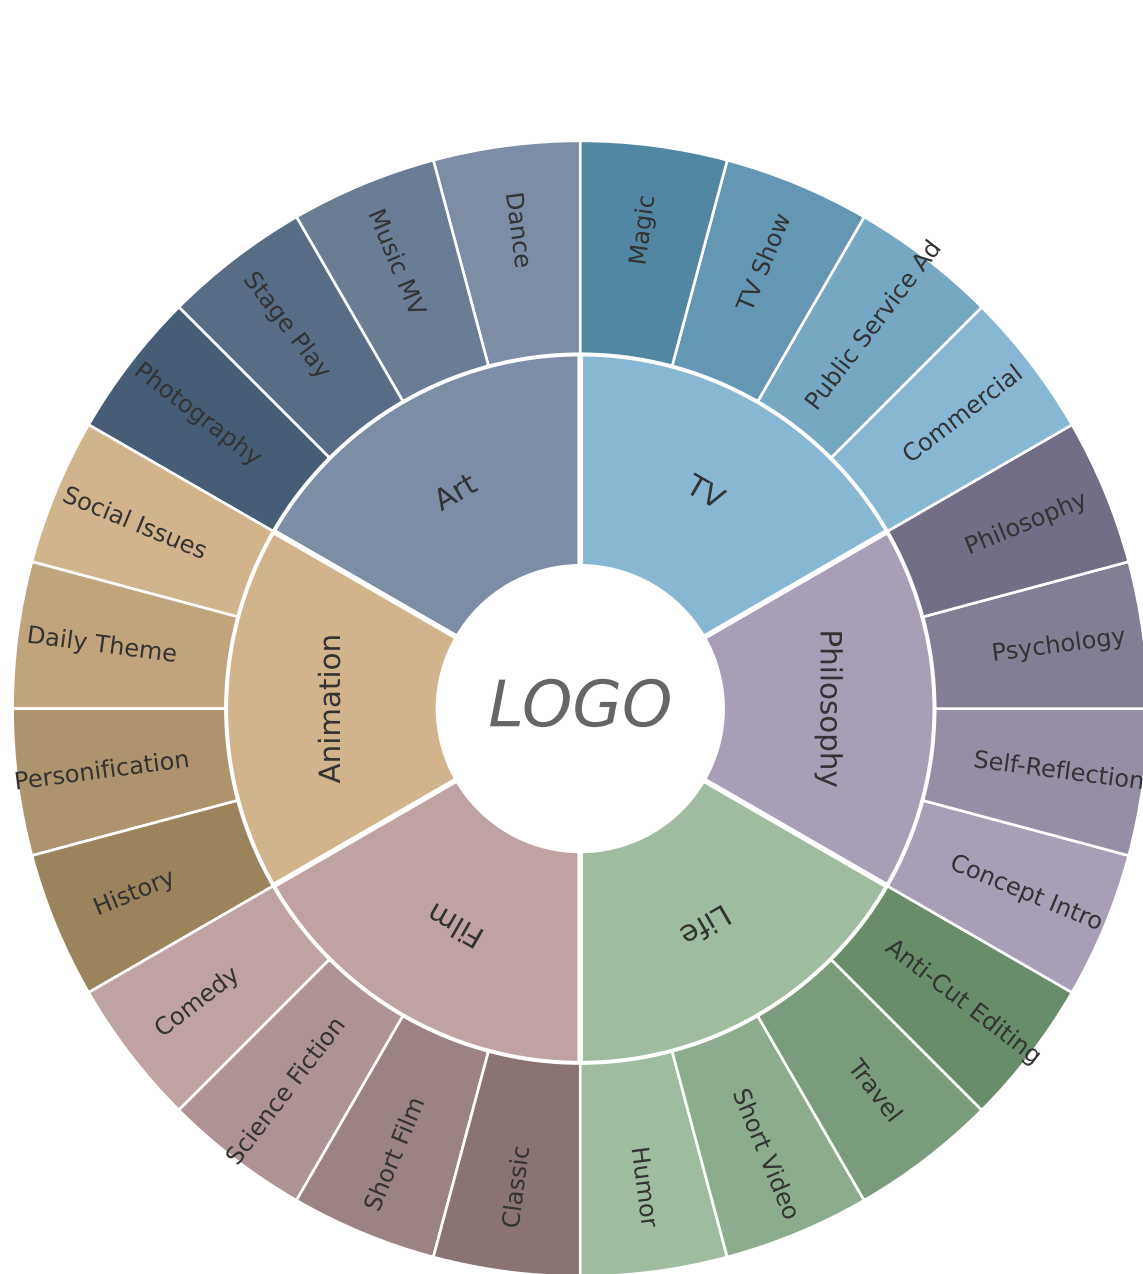

Supplement: supplementary_material [file enhanced_video_categories_fixed.pdf › supplement/MMR-V-main/figs/enhanced_video_categories_fixed.pdf]

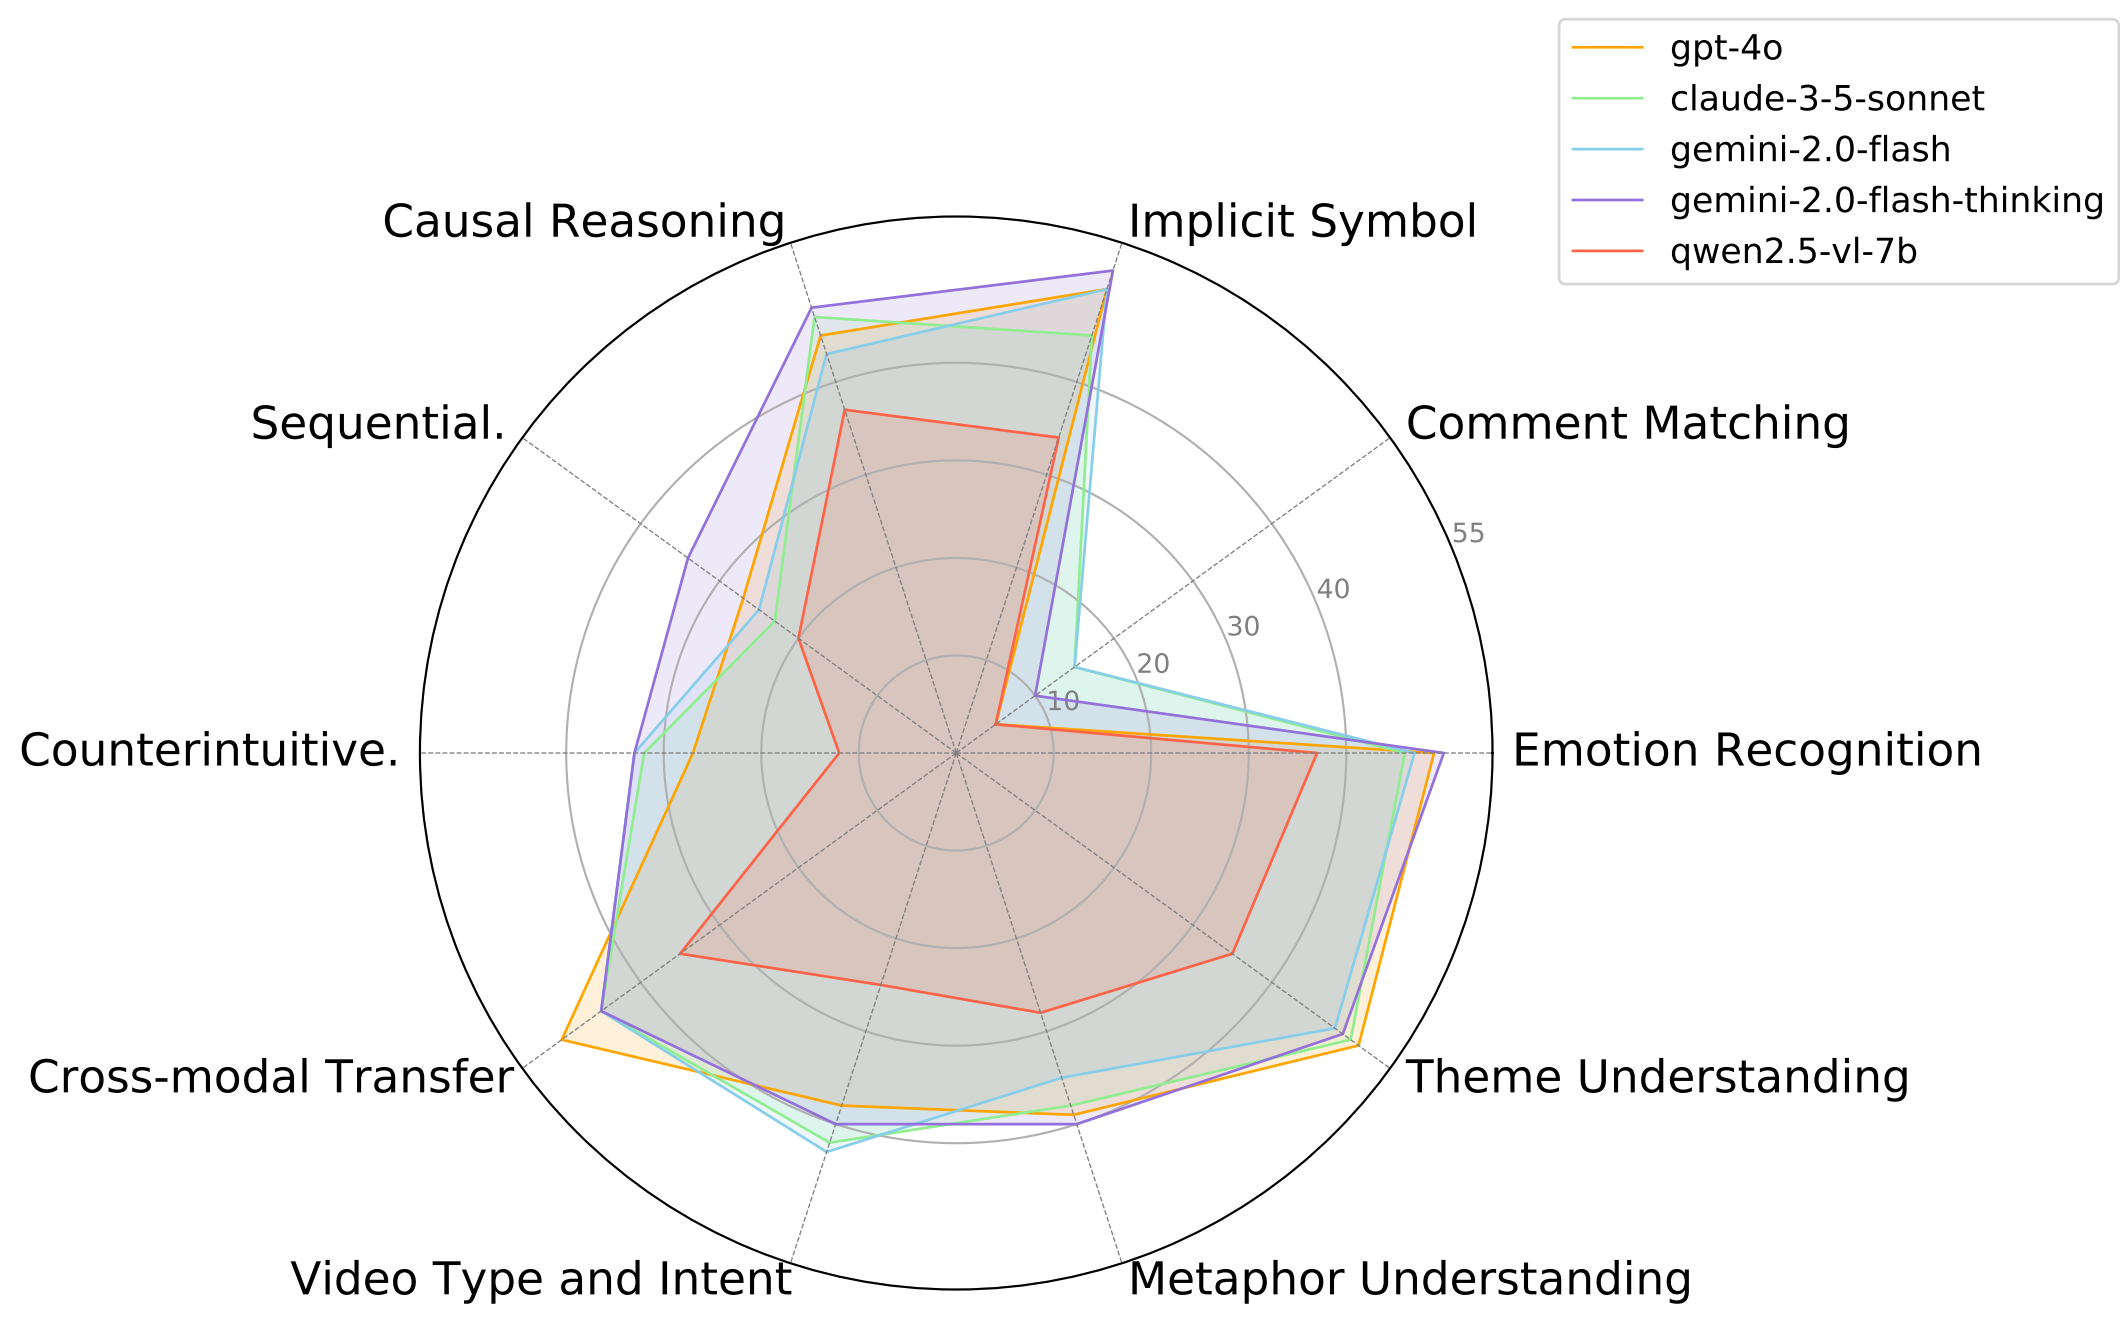

Supplement: supplementary_material [file task_analysis.pdf › supplement/MMR-V-main/figs/task_analysis.pdf]

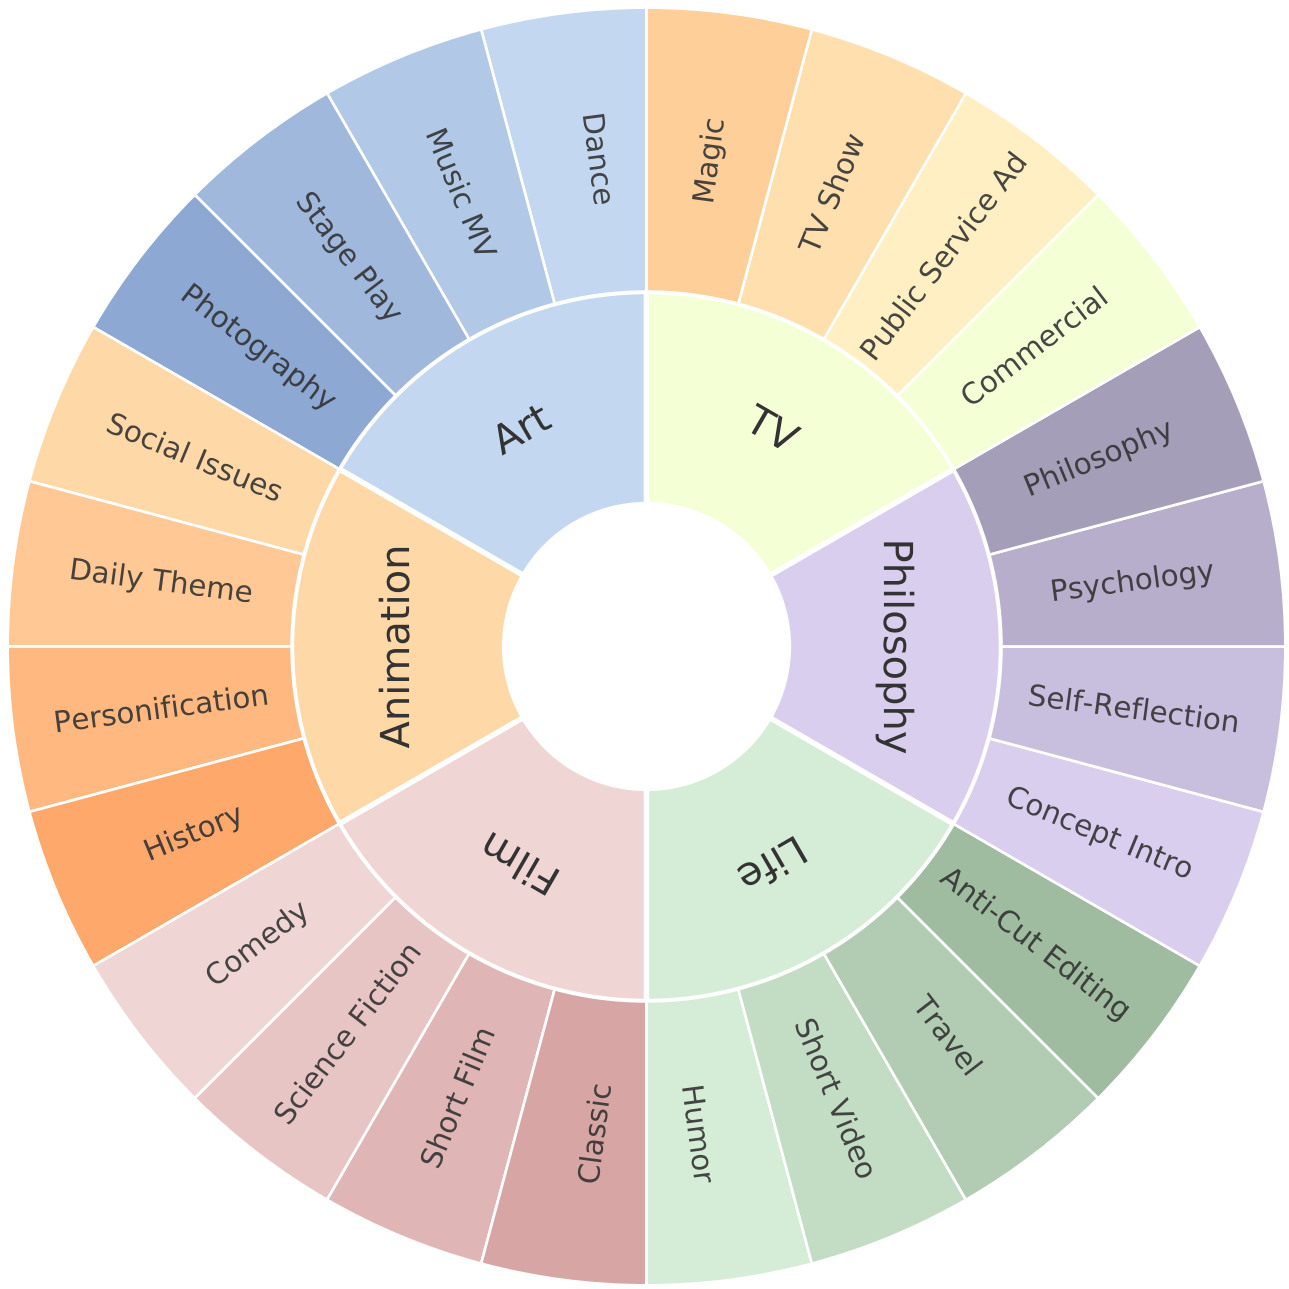

Supplement: supplementary_material [file video_type.pdf › supplement/MMR-V-main/figs/video_type.pdf]
